# Supplementary material for: Plant Peptides (NCRs) and Plant Immunity Play Vital Roles in Determining Specificity Between Alfalfa Cultivars and Sinorhizobium Meliloti Strain
Source: Research Square preprint supplement (doi:10.21203/rs.3.rs-1043144/v1), 2021-11-12
Supplement: Supplementary file 1 [file fae2f8c2bcef642b81607295.docx]

| **Additional file 9** Accession numbers of the RNA-seq datasets presented in this study | |
| --- | --- |
| Treatments | Accession numbers |
| G3-CK-1 | SRR8224077 |
| G3-CK-2 | SRR8224076 |
| G3-CK-3 | SRR8224075 |
| G3-LL2-1 | SRR8224074 |
| G3-LL2-2 | SRR8224073 |
| G3-LL2-3 | SRR8224072 |
| G9-CK-1 | SRR8224068 |
| G9-CK-2 | SRR8224059 |
| G9-CK-3 | SRR8224058 |
| G9-LL2-1 | SRR8224061 |
| G9-LL2-2 | SRR8224060 |
| G9-LL2-3 | SRR8224055 |
